# Supplementary material
Source: PubMed Central journal article supplement (PMC10123524)

**Stanford/Wisconsin validation  
Gleason**

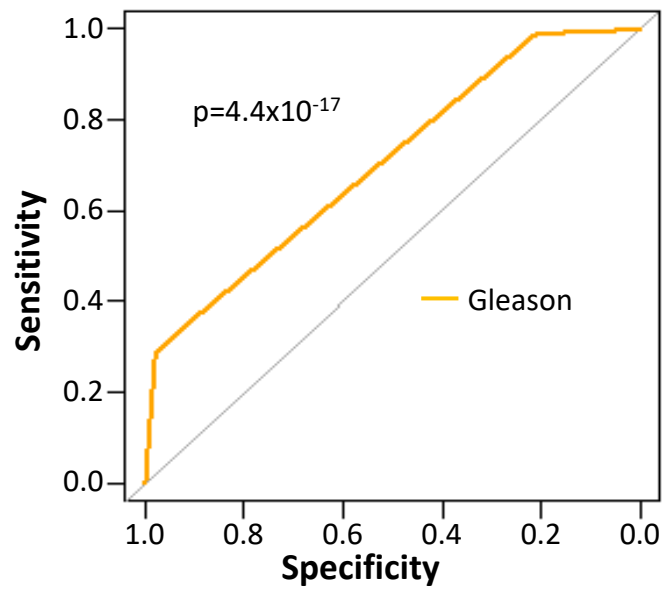

**Stanford/Wisconsin validation  
PSA**

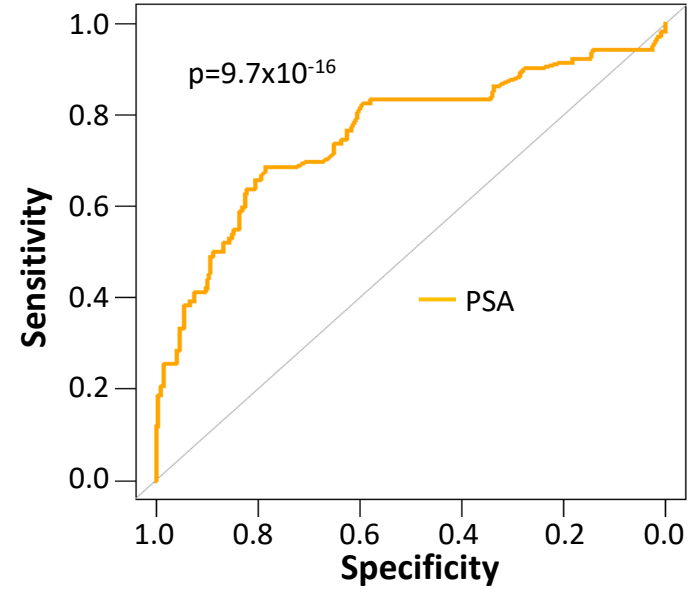

**Stanford/Wisconsin validation  
Gleason+PSA**

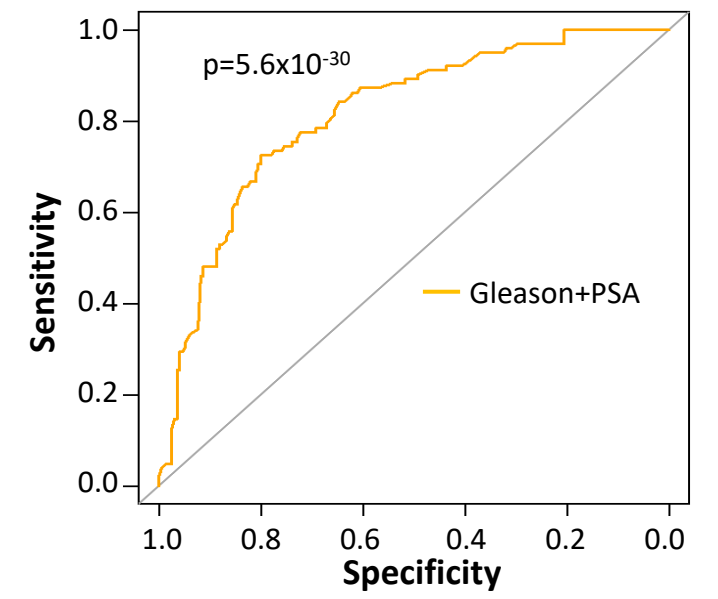

**Stanford/Wisconsin validation  
Gleason+fusions**

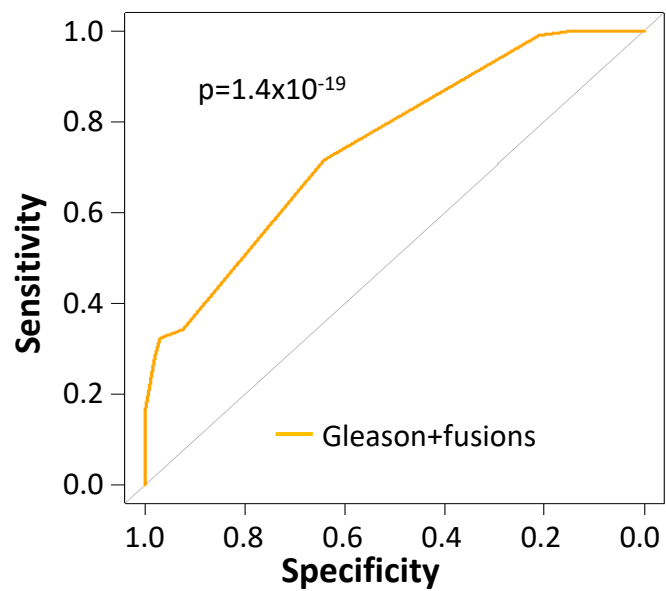

**Stanford/Wisconsin validation  
PSA+fusions**

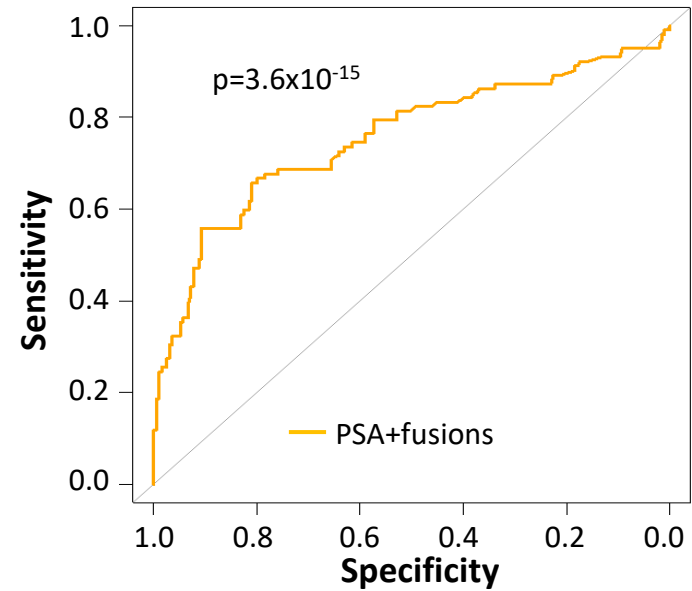

**Stanford/Wisconsin validation  
Gleason+PSA+fusions**

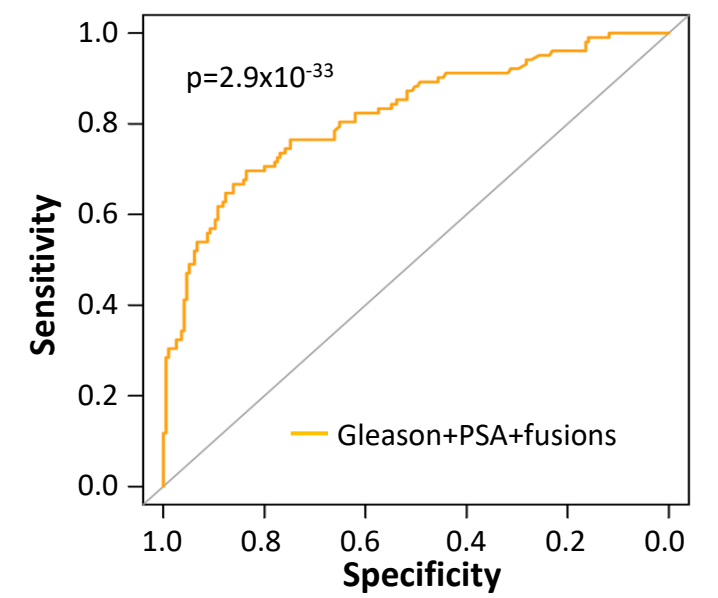

Supplement: mmc25.pdf [file mmc25.pdf]
